# Supplementary material for: Effective deep learning training for single-image super-resolution in endomicroscopy exploiting video-registration-based reconstruction
Source: Springer Nature journal article supplement (doi:10.1007/s11548-018-1764-0), 2018-04-23
Supplement: MOESM1 [file 15713636]

The movie called "[SR\\_pCLE.avi](#)" shows the sample results presented in the "Effective deep learning training for single-image super-resolution in endomicroscopy exploiting video-registration-based reconstruction" submitted at IPCAI 2018.

The movie shows pCLE sequence in 5 different configurations. All sequences were built from the validation set used for evaluating the performance of SR models we trained for pCLE super-resolution.

The sequences represent as follows (from left to right):

1. low-resolution input images from the validation-set
2. super-resolved output of the EDSR -based model
3. super-resolved output of the FSRCNN-based model
4. super-resolved output of the SRGAN-based model
5. high-resolution estimation of the input images generated by the mosaicking technique

Sequences are presented in two rows: the first row shows full image, the second row shows zoom for the central part of the image.

The link to the movie below (web viewer):

[https://drive.google.com/file/d/1FgoLLiStiA0mQpQsJ0wLK2CfFcy\\_EdIM/view](https://drive.google.com/file/d/1FgoLLiStiA0mQpQsJ0wLK2CfFcy_EdIM/view)
